# Supplementary material for: Sculpting and fusing biomimetic vesicle networks using optical tweezers
Source: PubMed Central journal article supplement (PMC5951844; doi:10.1038/s41467-018-04282-w), 2018-05-14
Supplement: 41467_2018_4282_MOESM2_ESM.pdf [file 41467_2018_4282_MOESM2_ESM.pdf]

### **Descriptions of Additional Supplementary Files:**

File Name: Supplementary Movie 1

Description: Vesicle adhesion and VIM formation

File Name: Supplementary Movie 2

Description: Constructing and reconfiguring vesicle networks

File Name: Supplementary Movie 3

Description: Formation of tethers

File Name: Supplementary Movie 4

Description: Laser-mediated fusion of gold nanoparticle labelled vesicles
